# Supplementary material for: Nutrient-responsive O-GlcNAcylation dynamically modulates the secretion of glycan-binding protein galectin 3
Source: PubMed Central journal article supplement — J Biol Chem. 2022 Feb 17;298(3):101743. doi: 10.1016/j.jbc.2022.101743 (PMC8920928; doi:10.1016/j.jbc.2022.101743), 2022-02-17
Supplement: mmc4.pdf [file mmc4.pdf]

A

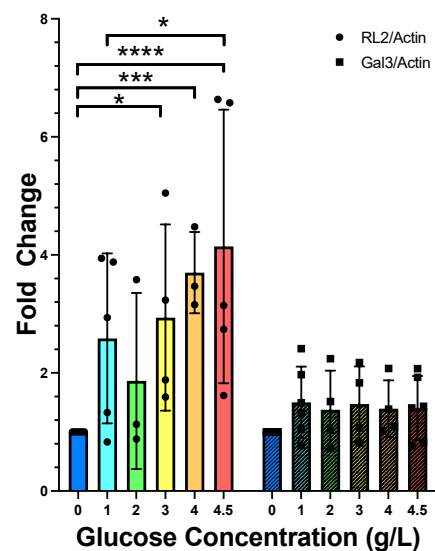

B

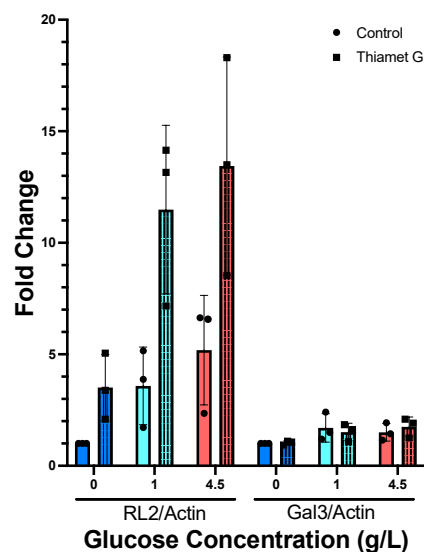

**Supplementary Figure 3:** Quantification of western blots of HeLa cells grown under different glucose conditions for 48 h shows a glucose dependent increase in *O*-GlcNAcylation corresponding to glucose concentration (A). Quantification of western blots of HeLa cells grown under different glucose conditions with or without Thiamet G (striped bar) treatment shows a glucose dependent increase in *O*-GlcNAcylation corresponding to glucose concentration and increase in *O*-GlcNAcylation corresponding to Thiamet G treatment (B) At least three independent experiments were carried out with representative blots shown and data expressed as mean  $\pm$  S.D. (error bars). \* indicates a  $p < 0.05$ , \*\*\* $p < .001$ , \*\*\*\* $p < .0001$  in a one way ANOVA with a Bonferroni post-test.
